# Supplementary material
Source: PubMed Central journal article supplement (PMC4023913)
Supplement: NIHMS111012-supplement-01.pdf [file NIHMS111012-supplement-01.pdf]

Supplemental Table 1. Diagnostic information for affected subjects in families supporting significant (chr15) or suggestive (chr 2, 7, 13) linkage peaks.

| Linkage peak                 | N supporting pedigrees | N affected | Male: Female (% male) | ASD: Autism (% ASD) | IQ>70 (%)        | Lang Delay (%)   | Mean ADI Domain Scores (SD) |                   |                  |                  |
|------------------------------|------------------------|------------|-----------------------|---------------------|------------------|------------------|-----------------------------|-------------------|------------------|------------------|
|                              |                        |            |                       |                     |                  |                  | Social                      | Verbal            | Non-verbal       | Restr/Repet      |
| 15q13.1-q14                  | 5                      | 20         | 15:5 (75.0%)          | 6:14 (30.0%)        | 12/18 (66.67%)   | 12/18 (66.67%)   | 17.9 (8.5; N=18)            | 13.3 (5.4; N=15)  | 13.0 (1.0; N=3)  | 5.9 (3.0; N=18)  |
| 15q14-q21.1                  | 6                      | 29         | 23:6 (79.3%)          | 9:20 (31.0%)        | 15/23 (65.22%)   | 16/24 (66.67%)   | 18.5 (8.1; N=27)            | 14.4 (5.3; N=23)  | 13.3 (1.0; N=4)  | 6.1 (3.0; N=27)  |
| 15q21.2-q22.1                | 9                      | 51         | 42:9 (82.4%)          | 13:38 (25.49%)      | 24/44 (54.55%)   | 31/42 (73.81%)   | 18.5 (7.7; N=47)            | 15.1 (5.5; N=41)  | 13.5 (0.8; N=6)  | 6.2 (2.7; N=47)  |
| 2p25.3-p24.1                 | 4                      | 23         | 20:3 (87.0%)          | <b>1:22 (4.35%)</b> | 17/22 (77.27%)   | 15/22 (68.18%)   | 19.4 (7.3; N=22)            | 15.1 (4.6; N=20)  | 14.0 (0.0; N=2)  | 6.4 (2.5; N=22)  |
| 7q31.31-q32.3                | 5                      | 25         | 22:3 (88.0%)          | 4:21 (16.0%)        | 13/20 (65.0%)    | 13/21 (61.9%)    | 18.7 (7.1; N=24)            | 15.1 (4.5; N=22)  | 14.0 (0.0; N=2)  | 6.2 (2.3; N=24)  |
| 13q12.1-1-q12.3              | 4                      | 19         | 17:2 (89.5%)          | 3:16 (15.79%)       | 8/18 (44.44%)    | 14/18 (77.78%)   | 17.7 (7.5; N=18)            | 15.7 (6.2; N=17)  | 14.0 (N=1)       | 6.1 (2.2; N=18)  |
| <b>All affected subjects</b> | 70                     | 192        | 162:30 (84.4%)        | 52:140 (27.08%)     | 112/172 (65.12%) | 116/166 (69.88%) | 19.7 (7.2; N=166)           | 15.5 (5.7; N=137) | 12.4 (2.2; N=29) | 6.4 (2.7; N=166) |

Note. Affected subjects in families supporting the chromosome 2 linkage peak had significantly fewer subjects with ASD than the full sample (Fishers exact test p=0.02). No other phenotypic characteristic was significantly different from the full sample.
